# Supplementary material
Source: Springer Nature journal article supplement (https://www.springermedizin.de/resource/supplementary/12936_2012_2677_MOESM1_ESM.pdf/9545110)

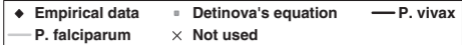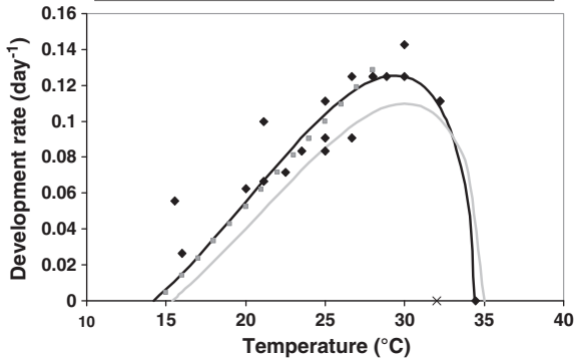

Supplement: MOESM1 [file 9545110]
